1 **The functional differences between paralogous regulators**  
2 **define the control of the General Stress Response in**  
3 ***Sphingopyxis granuli* TFA**

4

5

6 Rubén de Dios\*, Eduardo Santero & Francisca Reyes-Ramírez\*

7

8 Centro Andaluz de Biología del Desarrollo, Universidad Pablo de Olavide/Consejo

9 Superior de Investigaciones Científicas/Junta de Andalucía and Departamento de

10 Biología Molecular e Ingeniería Bioquímica, Universidad Pablo de Olavide.

11

12 \*Authors to whom correspondence should be addressed: R. de Dios  
13 (ruben.dediosbarranco@brunel.ac.uk) and F. Reyes-Ramírez (freyram@upo.es)

14

15 **ABSTRACT**

16 *Sphingopyxis granuli* TFA is a contaminant degrading alphaproteobacterium that  
17 responds to adverse conditions by inducing the General Stress Response (GSR), an  
18 adaptive response that controls the transcription of a variety of genes to overcome adverse  
19 conditions. The GSR triggered by TFA is driven by two extracytoplasmic function  $\sigma$   
20 factors (ECFs), EcfG1 and EcfG2, whose functional differences have been addressed  
21 previously, being EcfG2 the main activator. Upstream in this cascade, NepR anti- $\sigma$   
22 factors directly inhibit EcfG activity under non-stress conditions, whereas PhyR response  
23 regulators sequester the NepR elements upon stress sensing to relieve EcfG inhibition.  
24 These elements, which are essential mediators of the GSR regulation, are duplicated in

25 TFA, being NepR1 and NepR2, and PhyR1 and PhyR2. Here, based on multiple genetic,  
26 phenotypical and biochemical evidences including *in vitro* transcription assays, we have  
27 assigned distinct functional features to each of these paralogs and assessed their  
28 contribution to the GSR regulation, dictating its timing and the intensity. We show that  
29 different stress signals are differentially integrated into the GSR by PhyR1 and PhyR2,  
30 therefore producing different levels of GSR activation. We demonstrate *in vitro* that both  
31 NepR1 and NepR2 bind EcfG1 and EcfG2, although NepR1 produces a more stable  
32 interaction than NepR2. Conversely, NepR2 interacts with phosphorylated PhyR1 and  
33 PhyR2 more efficiently than NepR1. We propose an integrative model where NepR2  
34 would play a dual negative role: it would directly inhibit the  $\sigma$  factors upon activation of  
35 the GSR and it would modulate the GSR activity indirectly by titrating the PhyR  
36 regulators.

37

### 38 **IMPORTANCE**

39 In Alphaproteobacteria, the General Stress Response (GSR) aims at protecting against a  
40 variety of stresses. Needing to integrate different signals, its modulation is capital to  
41 produce a proportionate response according to the environmental conditions. Individual  
42 alphaproteobacterial species have evolved distinct GSR cascades in which the  
43 information flow is usually straightforward to ascertain due to the presence of a single  
44 copy of at least one of its main regulators (PhyR, NepR and EcfG), restricting the  
45 regulatory possibilities. However, *Sphingopyxis granuli* TFA encodes two paralogs of  
46 each regulator, multiplying the possible regulatory interplays. We demonstrate that  
47 functional differences between paralogous GSR regulators allow an intrinsic feedback  
48 regulation in this pathway. We provide evidence of a NepR anti- $\sigma$  factor that exerts a dual

49 negative feedback regulation on the GSR by interacting with the EcfG  $\sigma$  factors and with  
50 the PhyR regulators. This would attune its output to the actual needs of the cell.

51

## 52 INTRODUCTION

53 Microbial survivability in natural habitats is usually threatened by fluctuations in the  
54 environmental conditions. In order to adapt to these stressing situations, bacteria react by  
55 adjusting their transcriptional profile, triggering either specific or global responses,  
56 depending on the extent of the transcriptional remodeling. Frequent mechanisms used to  
57 control these responses upon exposure to a stimulus are one- or two-component systems,  
58 as well as alternative  $\sigma$  factors (Staroń *et al.*, 2009). One relevant example of a bacterial  
59 global response that is regulated by alternative  $\sigma$  factors is the General Stress Response  
60 (GSR), which is a protective broad response that generates cross-protection against a  
61 number of unrelated stresses (Staroń & Mascher, 2010). In *Bacillus subtilis* and related  
62 Gram-positive bacteria, the GSR is controlled by  $\sigma^B$  (Pané-Farré *et al.*, 2017), whereas  
63 this response is regulated by  $\sigma^S$  in many of the proteobacterial representatives of the  
64 Gram-negative species (Hengge, 2010; Battesti *et al.*, 2011). However,  
65 Alphaproteobacteria lack a  $\sigma^S$  ortholog (Staroń & Mascher, 2010). In this case, the GSR  
66 is regulated by a unique mechanism that combines two-component signalling and  
67 transcriptional activation by an extracytoplasmic function  $\sigma$  factor (ECF) (Francez-  
68 Charlot *et al.*, 2015), which are the most diverse and abundant alternative  $\sigma$  factors  
69 (Staroń *et al.*, 2009).

70 In the last decade, the GSR regulatory pathway has been described for a number of  
71 alphaproteobacterial representatives (Gourion *et al.*, 2009; Bastiat *et al.*, 2010; Herrou *et*  
72 *al.*, 2012; Jans *et al.*, 2013; Kim *et al.*, 2013; Fiebig *et al.*, 2015; Francez-Charlot *et al.*,  
73 2016; Gottschlich *et al.*, 2018; Lerdermann *et al.*, 2018; Lori *et al.*, 2018; Gottschlich *et*

74 *al.*, 2019). The central regulatory elements (the ECF EcfG, its cognate anti- $\sigma$  factor NepR  
75 and the response regulator PhyR) and the mechanistic principles of the signal transduction  
76 (Francez-Chalot *et al.*, 2009; Campagne *et al.*, 2012; Campagne *et al.*, 2014) are  
77 conserved in most members of this phylogenetic group (Fiebig *et al.*, 2015). In the  
78 absence of stress, EcfG is sequestered by NepR, preventing the transcription of the GSR  
79 regulon (Campagne *et al.*, 2012; Herrou *et al.*, 2015). Besides, PhyR would remain in its  
80 inactive conformation. When a stress appears, it would be sensed by one or more GSR-  
81 specific HRXXN histidine kinases, which would phosphorylate PhyR turning it into its  
82 active form. In this conformation, PhyR exposes a  $\sigma$ -like domain that is able to interact  
83 with NepR more efficiently than its cognate EcfG  $\sigma$  factor, promoting a partner switch  
84 (Gourion *et al.*, 2008; Francez-Charlot *et al.*, 2009; Campagne *et al.*, 2012; Herrou *et al.*,  
85 2015). This would release EcfG from inhibition, hence activating the transcription of the  
86 GSR regulon. Nevertheless, a number of species-specific variations in the signalling  
87 circuit may appear (Fiebig *et al.*, 2015). Such diversity includes the presence of paralogs  
88 of some of the core regulators (Bastiat *et al.*, 2010; Staroń & Mascher, 2010; Jans *et al.*,  
89 2013; Fiebig *et al.*, 2015; Francez-Charlot *et al.*, 2015; Francez-Charlot *et al.*, 2016),  
90 accessory elements involved in the phospho-signalling (Kaczmarczyk *et al.*, 2014;  
91 Gottschlich *et al.*, 2018; Lori *et al.*, 2018) or further control at the level of protein stability  
92 (Kim *et al.*, 2013). Involvement of paralogous regulators is the most common addition to  
93 the canonical regulatory pathway. In most cases, the different paralogs display specific  
94 functions in the control of the GSR, although with a certain level of redundancy in some  
95 instances. For example, in *Sinorhizobium meliloti*, two PhyR homologs (RsiB1 and  
96 RsiB2) regulate the GSR to similar extents (Bastiat *et al.*, 2010) in response to high  
97 temperature and stationary phase. On the other hand, in the same species, the NepR-like  
98 anti- $\sigma$  factors RsiA1 and RsiA2 seemed to control different aspects of the regulation,

99 since the deletion of *rsiA2* led to derepression of the response, whereas *rsiA1* mutation  
100 resulted in lethality (Bastiat *et al.*, 2010). The most accentuated known example of GSR  
101 regulator multiplicity is found in *Methylobacterium extorquens*, in which up to six EcfG  
102 paralogs are involved in the control of the response, with EcfG1 and EcfG2 playing a  
103 major role in the stress resistance (Francez-Charlot *et al.*, 2016). Furthermore, a main  
104 NepR protein seem to play a canonical anti- $\sigma$  role, inhibiting two EcfG paralogs (EcfG1  
105 and EcfG5 to a certain extent) and being amenable to PhyR sequestration, whereas an  
106 additional NepR copy (MexAM1\_META2p0735) is unable to interact with any of the  
107 EcfG paralogs. Rather, it interacts with PhyR and produces a negative effect on the GSR  
108 activity, thus suggesting it would act as an anti-anti-anti- $\sigma$  factor, which implies a  
109 divergent functional role in the regulation with respect to the main NepR paralog  
110 (Francez-Charlot *et al.*, 2016). Moreover, a similar NepR paralog specialization has also  
111 been proposed in *Sphingomonas melonis* for NepR2 with respect to NepR (Gottschlich *et*  
112 *al.*, 2019).

113 *Sphingopyxis granuli* TFA is an alphaproteobacterium that has been deeply characterized  
114 regarding its ability to use the organic solvent tetralin as carbon and energy source, both  
115 at the biochemical and genetic level (reviewed in Floriano *et al.*, 2019). Also, since the  
116 annotation of its genome and after confirmation by functional characterization (García-  
117 Romero *et al.*, 2016), it has been defined as the first facultative anaerobe within the  
118 *Sphingopyxis* genus due to its capability to respire nitrate anaerobically, and its global  
119 regulatory response to this condition has been described (González-Flores *et al.*, 2019;  
120 González-Flores *et al.*, 2020). Recently, the GSR regulators encoded in TFA were  
121 identified (de Dios *et al.*, 2020). This strain encodes two paralogs of each of the regulators  
122 of the central GSR pathway, distributed in two genomic loci: one bearing *nepR1* and  
123 *phyR1*, and other genomic location containing *nepR2* and *ecfG1* in a bicistronic operon,

124 *ecfG2* and *phyR2*. The individual roles of EcfG1 and EcfG2 in the regulation have been  
125 investigated (de Dios *et al.*, 2020), being EcfG2 the main GSR activator, as it confers  
126 stress resistance by itself and is able to control the expression of the whole GSR regulon.  
127 On the other hand, EcfG1 seems to play an accessory role, since its expression is EcfG2-  
128 dependent and it is only able to fully activate the transcription of part of the GSR target  
129 genes.

130 In this work we have further characterized the GSR regulatory pathway in TFA by  
131 combining *in vivo* and *in vitro* approaches. We show a functional differentiation between  
132 NepR1 and NepR2 in the control of the response and a different specificity in the stress  
133 signalling by PhyR1 and PhyR2. Finally, after reproducing the regulatory system *in vitro*,  
134 we propose an integrative model in which the PhyR regulators would produce different  
135 levels of activation of the GSR according to the stress that triggers it. Also, in this model  
136 NepR2 would play a dual role: it would directly inhibit the EcfG  $\sigma$  factors and it would  
137 negatively modulate the GSR activity indirectly, by titrating the PhyR regulators and  
138 releasing NepR1 to further inhibit EcfG1 and EcfG2, thus preventing an overactivation  
139 of the response.

140

## 141 RESULTS

### 142 1. NepR1 and NepR2 play specific roles in the regulation of the GSR

143 Previous analysis of the TFA genome annotation revealed that the elements  
144 involved in the core GSR signalling pathway appear duplicated (de Dios 2020). EcfG1  
145 and EcfG2 are the  $\sigma$  factors that drive the transcription of the GSR regulon, with EcfG2  
146 having the leading role in the activation (de Dios *et al.*, 2020). Upstream in the signalling  
147 cascade, the NepR1 and NepR2 paralogs would act as anti- $\sigma$  factors, inhibiting the GSR  
148 in the absence of stress. In the genome, *nepR1* is transcribed in a monocistronic operon,  
149 presenting up to two suboptimal GSR target promoters upstream its coding region (Sup.  
150 Fig. S1A). This is coherent with a subtle increase in transcription under GSR-inducing  
151 conditions, according to differential RNA-seq (dRNA-seq) data and RT-qPCR (Sup. Fig.  
152 S1B). In contrast, *nepR2* is transcribed as the first gene in the *nepR2ecfG1* operon in a  
153 GSR-dependent manner, presenting a canonical GSR target promoter upstream (Sup. Fig.  
154 S1A) (de Dios *et al.*, 2020). This causes a strong upregulation of *nepR2* transcription  
155 under GSR-inducing conditions, as shown by previous dRNA-seq data (de Dios *et al.*,  
156 2020) and RT-qPCR measurements (Sup. Fig. S1B). Due to their inhibitory function,  
157 their absence would theoretically lead to a derepression of the response under non-stress  
158 conditions.

159 In order to address their role in the regulation, the construction of the different  
160 *nepR* deletion mutants was attempted. However, in other Alphaproteobacteria (Bastiat *et*  
161 *al.*, 2010; Lourenço *et al.*, 2011), the deletion of a *nepR* homolog that is co-transcribed  
162 together with an EcfG coding gene in an autoregulated operon resulted in lethality. This  
163 has been argued to be due to an uncontrolled transcriptional activity of the respective  
164 EcfG ortholog on its own promoter in the absence of NepR, which may lead to a  
165 deleterious overactivation of the GSR. In agreement with this, *nepR1* could be deleted in

166 TFA, contrarily to *nepR2*. Nevertheless, a deletion mutant in the whole *nepR2ecfG1*  
167 operon could be constructed. To address the cause of the *nepR2* essentiality, *in trans*  
168 complementation experiments were performed. In these assays, the viability of the  
169  $\Delta nepR2ecfG1$  mutant was assessed after transformation with a plasmid bearing *ecfG1*  
170 without the promoter region, preceded by its own promoter or by a GSR-insensitive  
171 promoter. As shown in Sup. Fig. S2, the plasmid bearing *ecfG1* under its own promoter  
172 was the only one unable to be stabilized in the mutant, which highlights the essentiality  
173 of NepR2 to control the autoinduction of *ecfG1*.

174 To distinguish the specific role of each NepR paralog in the GSR regulation, a  
175 *nepR2::lacZ* reporter (which has been previously used to assess the GSR activity in TFA  
176 (de Dios *et al.*, 2020)) was integrated in the chromosome of the  $\Delta nepR1$  and the  
177  $\Delta nepR2ecfG1$  mutants, as well as in the  $\Delta nepR1\Delta nepR2ecfG1$  triple mutant. Next, their  
178  $\beta$ -galactosidase activity was measured in exponential (GSR repressed) and stationary  
179 phase (GSR active) and compared to those of the wild type and the  $\Delta ecfG1$  single mutant  
180 (the timepoints of activity measurement are specified in Sup. Fig. S3). According to the  
181 results shown in Fig. 1, the  $\Delta ecfG1$  mutant showed a slightly lower level of GSR activity  
182 in stationary phase (as previously reported in de Dios *et al.*, 2020), whilst the  $\Delta nepR1$   
183 mutant presented a derepressed GSR in exponential phase compared to the wild type,  
184 with a slight increase in stationary phase. The  $\Delta nepR2ecfG1$  performed similarly to the  
185 wild type and the  $\Delta ecfG1$  mutant in the repression of the GSR under exponential growth.  
186 However, in stationary phase, this mutant nearly doubled the activity of the wild type  
187 strain. In the case of the  $\Delta nepR1\Delta nepR2ecfG1$  mutant, in which a constitutively active  
188 EcfG2 would be alone to activate the response, a strong derepression was observed in  
189 exponential phase, presenting approximately a 40-fold increase in activity compared to  
190 the wild type TFA in exponential phase, which continued to increase in stationary phase



191 to even higher levels. The levels of activity reached by the triple mutant indicate that,  
192 even under stress conditions, the maximum levels of GSR expression are not reached by  
193 the wild type strain, suggesting that a proportion of the anti- $\sigma$  factors remain active under  
194 our experimental conditions. Altogether, these results suggest that NepR1 and NepR2  
195 have specific roles in GSR regulation, with NepR1 playing a main role in the global  
196 repression of the GSR in TFA in the absence of stress, and hence in its initial activation,  
197 and with NepR2 modulating the intensity of the response once it is active.

198

## 199 **2. NepR1 and NepR2 show different binding affinities for EcfG1 and EcfG2**

200 Structural studies describing the molecular aspects of the partner switching  
201 mechanism that mediate the GSR activation in Alphaproteobacteria revealed that the  
202 EcfG inhibition by NepR occurs by a direct protein-protein interaction (Campagne *et al.*,  
203 2012). Since TFA encodes two paralogs of each of these proteins, one possible model  
204 would be that each of the EcfG proteins were specifically titrated by one of the NepR  
205 anti- $\sigma$  factors. To explore this option, combinatorial mutants were constructed (namely,  
206  $\Delta nepR1\Delta ecfG1$ ,  $\Delta nepR1\Delta ecfG2$  double mutants and  $\Delta nepR1\Delta ecfG1\Delta ecfG2$  triple  
207 mutant) and their ability to resist to heavy metals and osmotic stress were tested. As a  
208 result (Sup. Fig. S4A) only those strains lacking *ecfG2* showed an increased sensitivity  
209 compared to the wild type. Contrarily, when  $\beta$ -galactosidase activity from the  
210 *nepR2::lacZ* fusion was measured in those backgrounds, it reached higher levels in the  
211  $\Delta nepR1\Delta ecfG2$  mutant compared to those of the  $\Delta nepR1\Delta ecfG1$  (even beyond those of  
212 the wild type TFA) as shown in Sup. Fig. S4B. These results imply that each EcfG paralog  
213 is not specifically titrated by one NepR protein. Rather, they would suggest a more  
214 complex interplay at the NepR-EcfG interface, which may be defined by the protein-  
215 protein affinities between each of the  $\sigma$ -anti- $\sigma$  pairs and the relative abundance of these

216 regulators in the cell. In order to characterise the four possible NepR-EcfG interactions  
217 (NepR1 with EcfG1 or EcfG2 and NepR2 with EcfG1 or EcfG2) and their effect on the  
218 transcriptional output of the response, each of these regulators was purified. After that,  
219 they were used in different combinations in an *in vitro* transcription (IVT) setup together  
220 with the native core RNAP purified from TFA and using the  $P_{nepR2}$  promoter as template  
221 (de Dios *et al.*, 2020). After fixing a common concentration for each EcfG paralog below  
222 RNAP saturation levels (de Dios *et al.*, 2020), either NepR1 or NepR2 were added to the  
223 reactions in increasing molecular proportion with respect to them (Fig. 2A). As a result,  
224 NepR1 was able to titrate either EcfG protein nearly in a 1:1 proportion, achieving a  
225 complete inhibition of transcription. In contrast, a 10:1 molecular excess of NepR2 with  
226 respect to either EcfG1 or EcfG2 could not reach similar levels of inhibition to those of  
227 NepR1, indicating a weaker interaction between NepR2 and the EcfG  $\sigma$  factors compared  
228 to that of NepR1. To further address this interplay, the NepR-EcfG protein-protein  
229 interactions were quantified by surface plasmon resonance. For these experiments either  
230 NepR1 or NepR2 were immobilised on CM5 chip and either EcfG1 or EcfG2 were  
231 injected as analytes under a continuous flow. Kinetic analysis of the interactions for each  
232 NepR-EcfG pair gave the respective dissociation constants ( $K_D$ ) shown in Fig. 2A. These  
233 results agree with those obtained with the *in vitro* transcription system, showing a  
234 correlation between lower  $K_D$  values and stronger repression of gene transcription. Thus,  
235 a stronger interaction between those EcfG-NepR pairs including NepR1 would be  
236 responsible for a more efficient repression of transcription compared to those pairs  
237 including NepR2.

238         Apart from the affinity between the different NepR-EcfG pairs, the relative  
239 amounts of each of the elements involved in an interaction also determines its output. To  
240 have an impression of the evolution of the *in vivo* protein accumulation of each of the

241 NepR and EcfG regulators, FLAG-tagged versions of each of them were constructed in a  
242 wild type background. Their accumulation was assessed by Western blot in exponential  
243 phase (in which the GSR would be off due to NepR inhibition) and in stationary phase  
244 (in which the GSR is active because of prevention of the NepR-EcfG interaction). As a  
245 result, a general increase in the accumulation of the four regulators was observed in  
246 stationary phase, with the most drastic change being that of NepR2 (Fig. 2B). These  
247 results are coherent with those obtained in the *in vitro* transcription assays, since NepR2  
248 would be needed in bigger amounts than NepR1 in order to perform an efficient  
249 inhibition.

250

251 **3. The GSR is specifically activated by PhyR1, PhyR2 or both of them depending on**  
252 **the stress**

253 The role of PhyR response regulators consists in derepressing the GSR upon  
254 receiving the stress signal in the shape of phosphorylation by sequestering NepR proteins,  
255 thus acting as indirect activators of the GSR regulon. In other alphaproteobacterial  
256 species, *phyR* mutants behave similarly to *ecfG* mutants regarding their stress resistance,  
257 displaying an increased sensitivity compared to the parental wild type strain. This is due  
258 to the inability of these strains to prevent EcfG titration by NepR.

259 In order to address the role of each PhyR paralog encoded in TFA in the GSR  
260 signalling, deletion mutants were constructed in each *phyR* gene, as well as a double  
261 mutant. Subsequently, the resulting mutant strains were challenged to resist a variety of  
262 stresses compared to the wild type strain and a  $\Delta ecfG1\Delta ecfG2$  double mutant, which is  
263 totally impaired in the GSR activation. The results revealed that an increased sensitivity  
264 to heavy metals (copper) was only observed in those  $\Delta phyR$  mutant backgrounds lacking  
265 *phyR2* (Fig. 3A). On the other hand, an increased sensitivity to oxidative stress was

266 obtained only in the absence of *phyR1* (Fig. 3B). Regarding the resistance to desiccation,  
267 all  $\Delta phyR$  mutant strains were affected compared to the wild type, with a milder  
268 sensitivity observed for the  $\Delta phyR2$  mutant (Fig. 3C). In contrast, only the  
269  $\Delta phyR1\Delta phyR2$  double mutant resulted more affected than the wild type under osmotic  
270 stress conditions (Fig. 3A). Altogether, this suggests that PhyR1 and PhyR2 are activated  
271 specifically depending on the stress that triggers the GSR signalling.

272

#### 273 **4. PhyR1 and PhyR2 produce different levels of activation of the GSR**

274 The results presented previously conveyed the idea that each of the PhyR  
275 regulators encoded in TFA performed distinctive roles in the GSR activation. To evaluate  
276 their ability to activate the response, the *nepR2::lacZ* reporter was introduced in each of  
277 the  $\Delta phyR$  mutant backgrounds and their  $\beta$ -galactosidase activity was measured in  
278 exponential and stationary phase compared to that of the wild type (Fig. 4). As expected,  
279 the  $\Delta phyR1\Delta phyR2$  mutant showed a similar level of activity to that of the  $\Delta ecfG1\Delta ecfG2$   
280 mutant. The  $\Delta phyR1$  single mutant showed a marked decrease in the activity, mainly  
281 observed in stationary phase, whereas the  $\Delta phyR2$  mutant produced slightly lower levels  
282 of activity than the wild type. These results indicate that PhyR1 is able to produce a  
283 stronger activation of the GSR than PhyR2, at least in stationary phase induced by carbon  
284 starvation.

285 After comparing  $\beta$ -galactosidase activity from the *nepR2::lacZ* fusion in the  
286 different  $\Delta phyR$  mutants to those of the  $\Delta ecfG$  mutants (de Dios *et al.*, 2020), similarities  
287 in both expression patterns were observed (i. e, the expression phenotype of the  $\Delta phyR1$   
288 mutant resembled that of an  $\Delta ecfG2$  mutant, and the phenotype of the  $\Delta phyR2$  mutant  
289 resembled that of the  $\Delta ecfG1$ ). This raised the question whether there would be a specific  
290 signalling from PhyR1 toward EcfG2 and from PhyR2 toward EcfG1. Nevertheless, a

291 *ΔphyR1ΔecfG1* double mutant, in which the only signalling stream possible would be  
292 from PhyR2 to EcfG2, showed a similar expression to that observed in the *ΔphyR1* single  
293 mutant (Sup. Fig. S5). This suggests that PhyR2, as well as PhyR1, are able to  
294 communicate stress to EcfG2, opening the possibility of a signal convergence via the  
295 NepR anti- $\sigma$  factors.

296

## 297 **5. PhyR1 and PhyR2 are able to interact more efficiently with NepR2 than with** 298 **NepR1**

299 As demonstrated for other alphaproteobacterial species, the only stream that the  
300 GSR signalling pathway follows is the PhyR-NepR-EcfG cascade, with no accessory  
301 regulation occurring between the PhyR and EcfG regulators known so far. Therefore, the  
302 only possibility that PhyR1 or PhyR2 may have to activate the transcription would be the  
303 direct interaction with either NepR1 or NepR2 in a 1:1 theoretical proportion.

304 In order to determine the ability of PhyR1 and PhyR2 to activate the GSR, they  
305 were purified and added to the previously set up IVT system. All possible PhyR-NepR-  
306 EcfG combinations were assayed, using a molecular NepR-EcfG proportion that would *a*  
307 *priori* inhibit transcription, such as 1.5:1 for the NepR1-EcfG pairs and 10:1 for the  
308 NepR2-EcfG pairs. The PhyR ratio used in the assays were 2:1 with respect to NepR1  
309 and 1:1 with respect to NepR2. To simulate an active or inactive status of the GSR,  
310 defined by the phosphorylation state of the PhyR proteins, the universal phosphor-donor  
311 acetyl phosphate (or a mock treatment) was added to the reactions accordingly. The  
312 results (Fig. 5, with an extended version presented in Sup. Fig. S6) show that only  
313 phosphorylated PhyR1 and PhyR2 were able to stimulate transcription using either EcfG1  
314 or EcfG2. Therefore, when acetyl phosphate was not added, transcription levels remained  
315 insensitive to the presence of either PhyR1 or PhyR2. Regarding the anti- $\sigma$  factor used in

316 each case, whereas both active PhyR1 and PhyR2 could relieve the inhibition exerted by  
317 NepR2 to different extents, only PhyR1 was able to activate transcription *in vitro* to  
318 detectable levels in the presence of NepR1 in the conditions tested (6.1-fold for PhyR1  
319 versus 1.3-fold for PhR2 using EcfG1 as  $\sigma$  factor; 1.2-fold for PhyR1 and no transcription  
320 stimulation by PhyR2 when adding EcfG2). This is coherent with the  $\beta$ -galactosidase  
321 activity results obtained using the *nepR2::lacZ* reporter, (814.6 M.U. in the  $\Delta$ *phyR2*  
322 mutant versus 237.8 M.U. in the  $\Delta$ *phyR1*, as shown in Fig. 4) thus confirming the greater  
323 potential of PhyR1 to trigger the GSR compared to PhyR2.

324         An intriguing observation from this data is the higher transcription levels obtained  
325 when using NepR2 in the presence of any of the phosphorylated PhyR proteins than when  
326 using NepR1. In the context of the dynamic protein-protein interactions that regulate the  
327 alphaproteobacterial GSR, this would mean that NepR1 is able to interact more efficiently  
328 with the EcfG  $\sigma$  factors than with the PhyR proteins (regardless of their phosphorylation  
329 state), contrarily to NepR2, which would present higher affinity for the active PhyR  
330 proteins than for the  $\sigma$  factors.

331

332

333

## 334 **DISCUSSION**

335 *S. granuli* TFA is an alphaproteobacterium that encodes two paralogs of each of  
336 the central regulators of the GSR. Paralogy in the regulatory elements of this pathway is  
337 usual among the Alphaproteobacteria. Although the signalling flow is usually  
338 straightforward to assess due to the configuration of the regulatory cascade (e.g.  
339 convergence from various PhyR and NepR paralogs to one EcfG  $\sigma$  factor (Bastiat 2010)  
340 or divergence from one PhyR-NepR stream to a number of EcfG representatives that act  
341 in series or in parallel (Lourenço *et al.*, 2011; Francez-Charlot *et al.*, 2016; Gottschlich *et*  
342 *al.*, 2019), establishing functional differences between *a priori* redundant regulators may  
343 be challenging. In the case of TFA, the interplay between EcfG1 and EcfG2 in the  
344 activation of the GSR regulon had already been addressed (de Dios *et al.*, 2020), depicting  
345 a model in which EcfG2 would be the master activator and EcfG1 would play an  
346 accessory role upon activation of the response, most likely as an amplifier of part of the  
347 regulon. In this work, we elucidate the signalling flow from the PhyR regulators to the  
348 EcfG  $\sigma$  factors via the NepR anti- $\sigma$  factors based on multiple genetic, phenotypical and  
349 biochemical evidences, highlighting the specific functional differences between  
350 paralogous elements.

351 *In vitro* experiments addressing the interaction between the NepR1 and NepR2  
352 anti- $\sigma$  factors and the EcfG1 and EcfG2  $\sigma$  factors clearly indicate that, although both  
353 proteins bind EcfG1 and EcfG2, NepR1 interacts more efficiently with EcfG1 and EcfG2  
354 than NepR2. This is a remarkable difference with previously described NepR-EcfG  
355 interactions, such as those of *C. crescentus* (Lourenço *et al.*, 2011) and *S. melonis*  
356 (Kaczmarczyk *et al.*, 2011). In the first case, the main NepR element does not interact  
357 with the secondary EcfG paralog. In TFA, the *in vitro* transcription assays and interaction  
358 quantifications show that NepR1 efficiently binds both EcfG  $\sigma$  factors, ruling out that

359 possibility. In the case of *S. melonis* a secondary NepR protein (also termed NepR2) is  
360 unable to be co-expressed with EcfG1 which has suggested an inefficient interaction  
361 between them (Gottschlich *et al.*, 2019). In TFA, IVT assays show that NepR2, in  
362 amounts sufficiently high (10:1 molecular excess with respect to either  $\sigma$  factor), is able  
363 to inhibit around 75% of the transcription driven by either EcfG1 or EcfG2. This hints  
364 that the interactions between NepR2 and both EcfG1 and EcfG2 in TFA would occur  
365 mainly upon GSR activation, when the *nepR2* transcription has already been induced and  
366 the respective protein product is present in sufficiently high cellular concentrations. On  
367 the other hand, before GSR activation, inhibition by NepR2 would be less prominent due  
368 to its negligible amounts, yet essential, compared to the inhibition exerted by NepR1. The  
369 *in vitro* differences between NepR1 and NepR2 are coherent with the *in vivo* expression  
370 measurements obtained with the *nepR2::lacZ* reporter in the *nepR* mutant backgrounds,  
371 assigning to NepR1 the role of controlling the initial activation of the GSR upon stress  
372 exposure. Later on, NepR2 would act once the response is active by modulating its final  
373 intensity. This role as feedback modulator has been discussed for other additional NepR  
374 orthologs (Francez-Charlot *et al.*, 2016; Gottschlich *et al.*, 2019) whose mechanistic  
375 insights will be further discussed below.

376         When various NepR paralogs are present, they may exhibit functional differences,  
377 such as those NepR pairs characterised in *M. extorquens* and *S. melonis*. In these species,  
378 the main NepR element binds either the main EcfG  $\sigma$  factor or PhyR, depending on the  
379 phosphorylation state of the response regulator. Oppositely, the secondary NepR paralog  
380 (MexAM1\_META2p0735 and NepR2, respectively) interacts with PhyR, but it seems  
381 unable to form a stable complex with any of the EcfG paralogs encoded in these species  
382 (Francez-Charlot *et al.*, 2016; Gottschlich *et al.*, 2019). This regulatory interplay supports  
383 a model in which, once the activation of the GSR is triggered by the PhyR-dependent



384 sequestration of the main NepR, the production of a paralogous NepR would titrate PhyR  
385 in a negative feedback loop so that a proportion of the primary NepR is available to inhibit  
386 the  $\sigma$  factor activity. The balance in the amounts of NepR bound either to EcfG or to  
387 PhyR would determine the levels of GSR activity. Furthermore, this has been proposed  
388 as a mechanism to rapidly switch off the response when the stress disappears (Gottschlich  
389 *et al.*, 2019). The IVT results obtained with the TFA regulators, together with the protein  
390 amounts of the two NepR anti- $\sigma$  factors before and after triggering the response, provide  
391 direct evidence to support this indirect negative feedback regulation. Also, NepR1 binds  
392 EcfG1 and EcfG2 more efficiently than NepR2, whereas the latter is able to interact with  
393 PhyR1 and PhyR2 (in their phosphorylated state) more efficiently than NepR1. Hence,  
394 the GSR would be modulated by a two-level negative feedback loop in TFA, with NepR2  
395 playing a dual role: i) directly inhibiting the EcfG1 and EcfG2 activity (mainly under  
396 GSR-inducing conditions and to a lesser extent in the absence of stress), and ii) indirectly  
397 inhibiting the GSR activity by titrating the active PhyR proteins (and thus releasing  
398 NepR1 to inhibit EcfG1 and EcfG2) to prevent the overactivation of the system.

399 Biochemical studies on the NepR-PhyR interaction (Luebke *et al.*, 2018) revealed  
400 that its specificity is determined by the NepR intrinsically disordered N-terminal region,  
401 termed FR1, particularly in the residues adjacent to the helix  $\alpha 1$ . This region also  
402 participates in the PhyR activation by enhancing its phosphorylation (Kaczmarczyk *et al.*,  
403 2014; Herrou *et al.*, 2015; Luebke *et al.*, 2018). Also, the FR1 fragment shows a strong  
404 divergence even comparing NepR paralogs encoded within the same strain, such as the  
405 TFA NepR1-NepR2 pair and the *S. melonis* NepR-NepR2 pair (Sup. Fig. S7). In  
406 agreement with Luebke *et al.* (2018), this region, especially in the fragment right next to  
407 the  $\alpha 1$  helix, was the most divergent between main and additional NepR paralogs, which  
408 may suggest different specificities for the respective EcfG and PhyR proteins. These

409 observations might explain the distinct interplay between NepR1 and NepR2 and the rest  
410 of regulators in this pathway, hinting at a modulatory role of NepR2 beyond the usual  $\sigma$ -  
411 anti- $\sigma$  titration.

412         Ascending further upstream in the GSR cascade, we tackled the characterisation  
413 of the two PhyR proteins encoded in TFA. In other Alphaproteobacteria with two PhyR  
414 paralogs (e.g. RsiB1 and RsiB2 from *S. meliloti* (Bastiat *et al.*, 2010)), both elements  
415 appear to exert a similar control on the GSR, since their mutation led to similar  
416 phenotypes. However, in TFA both PhyR1 and PhyR2 seem to play different functional  
417 roles as judged by the stress resistance assays testing the single and double  $\Delta phyR$   
418 mutants. These experiments indicate a specificity in the signalling depending on the stress  
419 that triggers the response. Nevertheless, given the nature of these regulators and their role  
420 in the signalling, it seems clear that they do not participate in the specific sensing  
421 themselves. Instead, there would be other elements above the PhyR level, such as the four  
422 putative HRXXN histidine kinases predicted in the TFA genome (SGRAN\_1165,  
423 SGRAN\_1773, SGRAN\_2544 and SGRAN\_3485) or any other phosphor-transfer  
424 element yet unknown, the ones differentiating among signals and/or transducing them  
425 selectively to either PhyR1, PhyR2 or both of them. The role of each PhyR regulator in  
426 this pathway was addressed measuring the activity of the *nepR2::lacZ* reporter under  
427 carbon starvation, a condition that seems to trigger the signalling through both PhyR  
428 elements (Fig. 4), although to different extends. The differences in GSR activation *in vivo*  
429 and the ability of each PhyR protein to stimulate transcription *in vitro* indicate that PhyR1  
430 is able to produce a stronger activation of the GSR compared to PhyR2. This would imply  
431 that PhyR1 and PhyR2 have different binding affinities for NepR1 and NepR2, eventually  
432 affecting the proportion of active EcfG  $\sigma$  factors, and thus, the intensity of the response.  
433 Taken together, the stress specificity showed by PhyR1 and PhyR2 and their different

434 abilities to bind NepR1 and NepR2 would suggest a mechanism to modulate the intensity  
435 of the GSR output accordingly to the stress that triggered it.

436         Taking together all the results obtained throughout this work, a step-wise GSR  
437 regulatory model proposed for TFA would be as depicted in Fig. 6. When some kind of  
438 stress appears either in the environment or in the cytoplasm, it would be sensed by one or  
439 more of the predicted HRXXN histidine kinases, causing an autophosphorylation in their  
440 conserved His residue. The signal would be transduced in a specific manner, either  
441 directly or indirectly, to PhyR1 and/or PhyR2, which would receive the phosphoryl in an  
442 Asp residue. The phosphorylation would trigger a conformational change to expose their  
443  $\sigma$ -like domains. This would lead to the sequestration of NepR1 in a different proportion,  
444 depending on whether the signalling occurred through PhyR1 and/or PhyR2. NepR1  
445 titration would release EcfG2 and the basal amount of EcfG1 from inhibition, thus  
446 activating the GSR regulon. As part of that regulon, the expression of the *nepR2ecfG1*  
447 operon would be induced, increasing EcfG1 and, more importantly, NepR2 levels. In a  
448 negative feedback loop, NepR2 would inhibit EcfG1 and EcfG2 in a direct manner by  
449 protein-protein interaction. Also, NepR2 would bind PhyR1 and/or PhyR2 with higher  
450 affinity than NepR1, titrating them away from the latter. After its release, NepR1 would  
451 be again available for directly inhibiting EcfG1 and EcfG2 together with the remaining  
452 NepR2. The effect of NepR2 at the EcfG and PhyR levels, together with its high  
453 accumulation, would ensure autoregulated levels of GSR by a negative feedback loop to  
454 prevent overactivation or to quickly switch GSR off.

455

456

457

458

## 459 MATERIALS AND METHODS

460 **Media and growth conditions.** *Escherichia coli* and *Sphingopyxis granuli* strains were  
461 routinely grown in LB rich medium (Sambrook *et al.*, 1989) at 37 °C or MML mineral  
462 medium (Andujar *et al.*, 2000) at 30 °C, respectively. When indicated, *S. granuli* strains  
463 were grown in minimal medium (Dorn *et al.*, 1974) supplemented with  $\beta$ -  
464 hydroxybutyrate (BHB) as a carbon source in concentrations 8 or 40 mM, depending on  
465 the experimental conditions. When appropriate, solid and liquid media were  
466 supplemented with kanamycin (25 mg/l for *E. coli*, 20 mg/l for *S. granuli*), ampicillin  
467 (100 mg/l for *E. coli*, 5 mg/l for *S. granuli*), streptomycin (50 mg/l for routine selection,  
468 200 mg/l for selection of co-integrates of pMPO1412-derivative plasmids) or X-gal (25  
469 mg/l).

470

471 **Plasmids, strains and oligonucleotides.** Bacterial strains, plasmids and oligonucleotides  
472 used in this work are indicated in Sup. Table S1.

473 For the generation of mutant strains with scar-less chromosomal modifications  
474 (deletions/insertions), the *SceI* double-strand break mediated double recombination  
475 procedure was followed as previously described (González-Flores *et al.*, 2019; de Dios  
476 *et al.*, 2020). Briefly, a pMPO1412-derivative plasmid containing upstream and  
477 downstream 1 kb flanking regions of the fragment to be deleted or the position where the  
478 insertion will be placed was transformed in the respective *S. granuli* parental strain and  
479 its recombination into the chromosome was selected in the presence of kanamycin.  
480 Double-check of recombinant candidates or co-integrates was performed by growing  
481 them in the presence of streptomycin (200 mg/l). Subsequently, plasmid pSWI (Martinez-  
482 Garcia & de Lorenzo, 2011), bearing the *SceI* open reading frame, was transformed into  
483 the co-integrate strain to force a second recombination event. Candidates bearing the

484 desired modifications were checked by PCR. For the construction of strains with multiple  
485 modifications, this procedure was performed serially with the different pMPO1412-  
486 derivative plasmids. Deletion mutants constructed with this strategy were MPO865 (with  
487 pMPO1416), MPO866 (with pMPO1414), MPO867 (with pMPO1415), MPO868 (with  
488 pMPO1414 and pMPO1415), MPO889 (with pMPO1416 using MPO860 as parental  
489 strain), MPO898 (with pMPO1428) and MPO899 (with pMPO1428 using MPO865 as  
490 parental strain). Strains bearing 3xFLAG-tagged genes constructed following this  
491 protocol were MPO906 (with pMPO1453), MPO907 (with pMPO1454), MPO908 (with  
492 pMPO1457) and MPO909 (with pMPO1458).

493 Strains bearing the *nepR2::lacZ* reporter inserted in the chromosome (MPO871,  
494 MPO872, MPO873, MPO874, MPO890, MPO900 and MPO902) were constructed by  
495 transforming the respective parental strain with plasmid pMPO1408 and selecting its  
496 chromosomal integration by a single recombination event.

497 For construction of pMPO1412 derivatives, the respective upstream and downstream  
498 flanking regions were amplified using *S. granuli* TFA genomic DNA as template and  
499 were subsequently assembled together by overlapping PCR. Oligonucleotide pairs used  
500 in each case were phyR1 del1 SacI-phyR1 del2 and phyR1 del3-phyR1 del4 BamHI for  
501 pMPO1414; phyR2 del1 BamHI-phyR2 del2 and phyR2 del3-phyR2 del4 EcoRI for  
502 pMPO1415; nepR1 del1 SacI-nepR1 del2 and nepR1 del3-nepR1 del4 BamHI for  
503 pMPO1416; ecfG1 FLAG-1 BamHI-ecfG1 FLAG-2 and ecfG1 FLAG-3-ecfG1 FLAG-4  
504 SacI for pMPO1453; ecfG2 FLAG-1 BamHI-ecfG2 FLAG-2 and ecfG2 FLAG-3-ecfG2  
505 FLAG-4 EcoRI for pMPO1454; nepR1-FLAG-1-nepR1-FLAG-2 and nepR1-FLAG-3-  
506 nepR1-FLAG-4 for pMPO1457; nepR2-FLAG-1-nepR2-FLAG-2 and nepR2-FLAG-3-  
507 nepR2-FLAG-4 for pMPO1458. For construction of pMPO1414, pMPO1415,  
508 pMPO1416, pMPO1453 and pMPO1454, the assembled PCR fragments were digested

509 with the appropriate restriction enzymes (included in the name of the respective  
510 oligonucleotides) and ligated into pMPO1412 digested with the same enzymes. In the  
511 case of pMPO1457, pMPO1458, pMPO1459 and pMPO1460, the assembled PCR  
512 fragments were directly cloned into pMPO1412 cut with SmaI.

513 The pMPO1412 derivative pMPO1428, used for the deletion of the *nepR2ecfG1* operon,  
514 was constructed based on the previously constructed pMPO1407 and pMPO1413 (de  
515 Dios *et al.*, 2020). pMPO1407 was digested with XhoI, blunted with Klenow and  
516 subsequently cut with Acc65I. The resulting 1 kb fragment was ligated into pMPO1413  
517 digested with StuI and Acc65I.

518 pTXB1 and pTYB21 derivatives for protein overproduction were constructed based on  
519 the guidelines provided with the IMPACT kit (New England Biolabs). The coding  
520 sequences of *nepR1*, *nepR2*, *phyR1* and *phyR2* were amplified by PCR from *S. granuli*  
521 TFA genomic DNA using oligonucleotide pairs ORF-*nepR1* fw-ORF-*nepR1* rv BamHI,  
522 ORF-*nepR2* fw-ORF-*nepR2* rv BamHI, ORF-*phyR1* fw NdeI-ORF-*phyR1* rv and ORF-  
523 *phyR2* fw NdeI-ORF-*phyR2* rv, respectively. *nepR1* and *nepR2* fragments were digested  
524 with BamHI and ligated into pTYB21 cut with SapI, blunted with Klenow and digested  
525 with BamHI, resulting in plasmids pMPO1434 and pMPO1435, respectively. *phyR1* and  
526 *phyR2* fragments were digested with NdeI and ligated into pTXB1 cut with SapI, blunted  
527 with Klenow and digested with NdeI, resulting in plasmids pMPO1436 and pMPO1437,  
528 respectively.

529

530 **Stress phenotypic assays.** Stress resistance assays were performed as in de Dios *et al.*  
531 (2020). Briefly, to test the resistance to osmotic stress and copper, 10 µl spots of serial  
532 dilutions of late-exponential phase cultures were placed on solid MML rich medium  
533 plates supplemented with NaCl 0.6 M or CuSO<sub>4</sub> 3.5 mM and incubated for 5 days at 30

534 °C. For desiccation assays, 5 µl spots of serial dilutions of late-exponential phase cultures  
535 were placed on 0.45 µm pore size filters (Sartorius Stedim Biotech GmbH) and they were  
536 left to air-dry in a laminar flow cabin for 5 h (5 min in the control assay). Then, filters  
537 were placed on MML rich medium plates supplemented with bromophenol blue 0.002%  
538 and incubated for 5 days at 30 °C. In the case of recovery from oxidative shock, late-  
539 exponential phase cultures were diluted to an OD<sub>600</sub> of 0.1 in MML medium. When an  
540 OD<sub>600</sub> 0.5 was reached, H<sub>2</sub>O<sub>2</sub> was added to the medium in a final concentration of 10  
541 mM. Recovery from the treatment is represented by a percentage of the OD<sub>600</sub> reached  
542 by treated cultures after 5 h of growth compared to non-treated cultures. At least three  
543 independent replicates of each experiment were performed, and most representative  
544 examples are shown.

545

546 **GSR activation assays and expression measurements.** Saturated preinocula were  
547 diluted to an OD<sub>600</sub> of 0.05 in minimal medium supplemented with β-hydroxybutyrate 40  
548 mM and incubated at 30 °C in an orbital shaker for 16 h. Then, 20 ml of minimal medium  
549 with β-hydroxybutyrate 8 mM were inoculated at OD<sub>600</sub> 0.1. β-galactosidase activity  
550 (Miller, 1972) from the *nepR2::lacZ* reporter was measured after 10 h and 58 h of growth,  
551 representing exponential and stationary phase, respectively (Sup. Fig. 3). Averages of  
552 three independent replicates are represented.

553

554 **Protein overexpression and purification.** *S. granuli* TFA core RNA polymerase, EcfG1  
555 and EcfG2 were purified as previously published in de Dios *et al.* (2020).

556 NepR1, NepR2, PhyR1 and PhyR2 proteins were overexpressed and purified using the  
557 IMPACT kit (New England Biolabs) following the manufacturer's instructions and equal  
558 procedures for the four of them. Briefly, pMPO1434, pMPO1435, pMPO1436 and

559 pMPO1437 (for overexpression of *nepR1*, *nepR2*, *phyR1* and *phyR2*, respectively) were  
560 transformed into *E. coli* ER2566 host strain. Saturated pre-inocula of each plasmid-  
561 bearing strain were diluted to an OD<sub>600</sub> of 0.1 in different total volumes of LB medium,  
562 depending on the gene to be overexpressed (2 l for *nepR1*, 1 l for *nepR2*, 4 l for *phyR1*  
563 and 1 l for *phyR2*), and incubated at 37 °C in an orbital shaker until reaching OD<sub>600</sub> 0.7.  
564 Then, cultures were chilled on ice and subsequently induced with IPTG 0.5 mM and  
565 incubated overnight in a shaker at 16 °C. After harvesting the cultures and assessing the  
566 induction by SDS-PAGE, cell pellets were resuspended in binding buffer (Tris-HCl 20  
567 mM pH 8, NaCl 0.5 M), lysed by sonication and clarified by centrifugation. Once the  
568 chitin resin was packed in a purification column and washed with binding buffer, the  
569 respective clarified lysates were loaded on the column and left to flow through the resin  
570 by gravity at a low flow rate. Afterwards, the column was flushed with 100 ml of binding  
571 buffer prior to the induction of the on-column protein cleavage. To release the target  
572 protein, the resin was incubated with TEDG buffer (Tris-HCl 50 mM pH 8, glycerol 10%,  
573 Triton X-100 0.01%, EDTA 0.1 mM, NaCl 50 mM) supplemented with DTT 50 mM at  
574 18 °C for 40 h approximately. The eluate content in the target protein was assessed by  
575 SDS-PAGE. Then, DTT concentration in the buffer was reduced by dialysis against  
576 TEDG buffer with DTT 0.1 mM at 4 °C overnight using a 3 KDa pore size dialysis  
577 cassette (ThermoFisher Scientific). Finally, purity and concentration of the protein  
578 mixtures were evaluated by densitometry comparing to different dilutions of BSA using  
579 a Typhoon scanner and the ImageLab software. For long-term storage, protein mixtures  
580 were aliquoted and frozen at -80 °C.

581

582 ***In vitro* transcription.** Multi-round *in vitro* transcription (IVT) reactions were performed  
583 as in Porrua *et al.* (2009) with modifications from de Dios *et al.* (2020). Briefly, reactions



584 were run in a final volume of 22.5  $\mu$ l in IVT buffer (Tris-HCl 10 mM pH 8, NaCl 50 mM,  
585 MgCl<sub>2</sub> 5 mM, KCl 100 mM, BSA 0.2 mg/ml, DTT 2  $\mu$ M) at 30 °C. A mixture containing  
586 the appropriate combination of the different GSR regulators, either supplemented or not  
587 with acetyl phosphate 15 mM depending on the experiment, was preincubated at 30 °C  
588 for 5 min. In this mixture, to ensure that any transcriptional activation would be due to  
589 disruption of the EcfG-NepR interaction by PhyR, the right amount of each PhyR protein  
590 (with or without acetyl phosphate) was added first in a tube chilled on ice followed by a  
591 volume bearing the appropriate EcfG-NepR pair also pre-incubated on ice. 0.2  $\mu$ M of the  
592 respective EcfG  $\sigma$  factor was set as reference to establish molecular proportions with the  
593 rest of the regulators present in the reaction. After that, the core RNA polymerase mix  
594 was added to the reaction and it was incubated for 5 min. Subsequently, 0.5  $\mu$ g of plasmid  
595 pMPO1440 were added as circular template. 10 min later, a mix of ATP, GTP, CTP (final  
596 concentration of 0.4 mM), UTP (0.07 mM) and [ $\alpha$ -<sup>32</sup>P]-UTP (0.33 mM, Perkin Elmer)  
597 was added to start the reaction. After 10 min, reaction re-initiation was prevented by  
598 adding heparin to a final concentration of 0.1 mg/ml, and 10 min later reactions were  
599 arrested by adding 5  $\mu$ l of stop/loading buffer (0.5 % formamide, 20 mM EDTA, 0.05%  
600 bromophenol blue, 0.05% xylene cyanol). Samples were boiled for 3 min and run in a 4%  
601 polyacrylamide-urea denaturing gel in TBE buffer at room temperature. Gels were dried  
602 and exposed in a phosphoscreen and results were visualised in an Amersham Typhoon  
603 scanner and analysed using the ImageQuant software (both provided by GE Healthcare  
604 Bio-Sciences AB). Quantifications refer to the median intensity of each band normalised  
605 against the levels of transcription obtained by each EcfG protein alone, in the absence of  
606 PhyR and NepR. The figure shows a representative assay of this experiment and  
607 quantifications are the average of three independent replicates.

608

609 **Protein immunodetection (Western blot).** Samples were obtained from cultures in  
610 exponential and stationary phase as explained above for gene expression assays. For each  
611 sample, 1 OD<sub>600</sub> unit was harvested by centrifugation and the cell pellet was resuspended  
612 in 25 µl bidistilled water. Whole-cell protein content was measured using the RC DC  
613 Protein Assay kit (Bio-Rad) and the remaining sample was mixed with loading buffer 2X,  
614 boiled for 5 min and centrifuged. The equivalent volume to 10 µg of protein was run in a  
615 Stain-Free FastCast 12.5% polyacrylamide gel (Bio-Rad) and transferred to a  
616 nitrocellulose membrane using the Trans-Blot Turbo semi-dry system (Bio-Rad)  
617 following the manufacturer's instructions. The membrane was washed with TTBS buffer  
618 and blocked with 5% skimmed milk powder in TTBS buffer (blocking solution).  
619 Subsequently, the membrane was incubated overnight with a 1:2000 dilution of mouse  
620 monoclonal anti-FLAG antibody (Sigma-Aldrich) in blocking solution at 4 °C with mild  
621 shaking. Then, the membrane was washed with TTBS, incubated for 2 h with a 1:10000  
622 dilution of anti-mouse secondary antibody (Sigma-Aldrich) in blocking solution at room  
623 temperature with mild shaking and washed again with TTBS. Finally, the membrane was  
624 developed with the Immun-Star AP Chemiluminescence kit (Bio-Rad) and the signal was  
625 detected with a ChemiDoc image system (Bio-Rad) and analysed with the ImageLab  
626 software (Bio-Rad). Representative experiments from three independent replicates are  
627 shown. Quantifications refer to the average fold-change in stationary phase compared to  
628 exponential phase of three independent replicates.

629

630 **Surface plasmon resonance.** EcfG1 and EcfG2 interaction kinetics with respect to  
631 immobilised NepR1 or NepR2 were measured using a BIAcore X100 device (GE  
632 Healthcare Life Sciences). Assays were performed at 30 °C in TEDG buffer. NepR1 (12.1  
633 RU) or NepR2 (36.4 RU) were immobilised in on the surface of a CM5 chip using 10

634 mM acetate buffer pH 4.0 or 5 mM malate buffer pH 5.5, respectively, at 30 °C with a  
635 contact time of 300 s, following the manufacturer's instructions. Serial 2-fold dilutions  
636 of EcfG1 and EcfG2 in TEDG buffer were injected in the system at a flow rate of 20  
637  $\mu\text{l}/\text{min}$  in concentrations ranging from 60 nM to 0.469 nM. Analyte contact time was  
638 enough to reach interaction equilibrium and dissociation time was 300 s. After each  
639 interaction cycle, the chip was regenerated by injection of 10 mM glycine-HCl buffer pH  
640 2.0. Data were fitted to a 1:1 interaction model using the evaluation software provided by  
641 the manufacturer (GE Healthcare Life Sciences). Reliability of the results was assessed  
642 according to U-value  $< 15$  and  $\chi^2 < 5\%R_{\text{max}}$ . Interaction affinity was defined by the  
643 dissociation constant ( $K_D$ ) obtained for each NepR-EcfG pair. At least three independent  
644 replicates were assayed for each pair.

645

646

#### 647 **Acknowledgements**

648 We wish to thank Guadalupe Martín and Nuria Pérez for technical help and all members  
649 of the laboratory for their insights and helpful suggestions. This work was supported by  
650 grant BIO2014-57545-R, co-funded by the Spanish Ministry for Education and Science  
651 and the European Regional Development Fund, and by the FPU fellowship (Ref.  
652 FPU15/04789, Ministerio de Educación y Ciencia, Spain), awarded to R.D.

653

654

#### 655 **Author contributions**

656 R.D. performed the experiments, R.D., F.R.-R. and E.S. designed the experimental  
657 strategy and analysed the results. F.R.-R. and E.S. supervised the work. R.D. and F.R.-R.  
658 wrote the manuscript considering the revisions of all the authors.

659

660 **Competing interests**

661 The authors declare no competing interests.

662

663 **REFERENCES**

664 Andújar E, Hernáez MJ, Kaschabek SR, Reineke W & Santero E. Identification of an  
665 extradiol dioxygenase involved in tetralin biodegradation: gene sequence analysis and  
666 purification and characterization of the gene product. *J Bacteriol* (2000), 182(3):789-95.  
667 doi: 10.1128/jb.182.3.789-795.2000.

668 Bastiat B, Sauviac L & Bruand C. Dual control of *Sinorhizobium meliloti* RpoE2 sigma  
669 factor activity by two PhyR-type two-component response regulators. *J Bacteriol* (2010),  
670 192(8):2255-65. doi: 10.1128/JB.01666-09.

671 Battesti A, Majdalani N & Gottesman S. The RpoS-mediated general stress response  
672 in *Escherichia coli*. *Annu Rev Microbiol* (2011), 65:189-213. doi: 10.1146/annurev-  
673 micro-090110-102946.

674 Campagne S, Damberger FF, Kaczmarczyk A, Francez-Charlot A, Allain FH &  
675 Vorholt JA. Structural basis for sigma factor mimicry in the general stress response of  
676 Alphaproteobacteria. *Proc Natl Acad Sci U S A* (2012), 109(21):E1405-14. doi:  
677 10.1073/pnas.1117003109.

678 Campagne S, Marsh ME, Capitani G, Vorholt JA & Allain FH. Structural basis for -  
679 10 promoter element melting by environmentally induced sigma factors. *Nat Struct Mol*  
680 *Biol* (2014), 21(3):269-76. doi:10.1038/nsmb.2777.

681 de Dios R, Rivas-Marin E, Santero E & Reyes-Ramírez F. Two paralogous EcfG  $\sigma$   
682 factors hierarchically orchestrate the activation of the General Stress Response in  
683 *Sphingopyxis granuli* TFA. *Sci Rep* (2020), 20;10(1):5177. doi: 10.1038/s41598-020-  
684 62101-z.

685 Dorn E, Hellwig M, Reineke W & Knackmuss HJ. Isolation and characterization of a  
686 3-chlorobenzoate degrading pseudomonad. *Arch Microbiol* (1974), 99(1):61-70. doi:  
687 10.1007/BF00696222.

688 Fiebig A, Herrou J, Willett J & Crosson S. General Stress Signaling in the  
689 Alphaproteobacteria. *Annu Rev Genet* (2015), 49:603-25. doi: 10.1146/annurev-genet-  
690 112414-054813.

691 Floriano B, Santero E & Reyes-Ramírez F. Biodegradation of Tetralin: Genomics,  
692 Gene Function and Regulation. *Genes* (2019), 6;10(5):339. doi:  
693 10.3390/genes10050339.

694 Francez-Charlot A, Frunzke J, Reichen C, Ebnetter JZ, Gourion B & Vorholt JA. Sigma  
695 factor mimicry involved in regulation of general stress response. *Proc Natl Acad Sci U S*  
696 *A* (2009), 3;106(9):3467-72. doi: 10.1073/pnas.0810291106.

697 Francez-Charlot A, Frunzke J, Zingg J, Kaczmarczyk A, Vorholt JA. Multiple  $\sigma^{\text{EcfG}}$   
698 and NepR Proteins Are Involved in the General Stress Response in *Methylobacterium*  
699 *extorquens*. *PLoS One* (2016), 11(3):e0152519. doi: 10.1371/journal.pone.0152519.

700 Francez-Charlot A, Kaczmarczyk A, Fischer HM & Vorholt JA. The general stress  
701 response in Alphaproteobacteria. *Trends Microbiol* (2015), 23(3):164-71. doi:  
702 10.1016/j.tim.2014.12.006.

703 González-Flores YE, de Dios R, Reyes-Ramírez F & Santero E. Identification of two  
704 *fnr* genes and characterisation of their role in the anaerobic switch in *Sphingopyxis*  
705 *granuli* strain TFA. *Sci Rep* (2020), 3;10(1):21019. doi: 10.1038/s41598-020-77927-w.

706 González-Flores YE, de Dios R, Reyes-Ramírez F & Santero E. The response of  
707 *Sphingopyxis granuli* strain TFA to the hostile anoxic condition. *Sci Rep* (2019),  
708 18;9(1):6297. doi: 10.1038/s41598-019-42768-9.

709 Gottschlich L, Bortfeld-Miller M, Gäbelein C, Dintner S & Vorholt JA. Phosphorelay  
710 through the bifunctional phosphotransferase PhyT controls the general stress response in  
711 an alphaproteobacterium. *PLoS Genet* (2018), 13;14(4):e1007294. doi:  
712 10.1371/journal.pgen.1007294.

713 Gottschlich L, Geiser P, Bortfeld-Miller M, Field CM & Vorholt JA. Complex general  
714 stress response regulation in *Sphingomonas melonis* Fr1 revealed by transcriptional  
715 analyses. *Sci Rep* (2019), 28;9(1):9404. doi: 10.1038/s41598-019-45788-7.

716 Gourion B, Francez-Charlot A & Vorholt JA. PhyR is involved in the general stress  
717 response of *Methylobacterium extorquens* AM1. *J Bacteriol* (2008), 190(3):1027-35. doi:  
718 10.1128/JB.01483-07.

719 Gourion B, Sulser S, Frunzke J, Francez-Charlot A, Stiefel P, Pessi G, Vorholt JA &  
720 Fischer HM. The PhyR-sigma(EcfG) signalling cascade is involved in stress response and  
721 symbiotic efficiency in *Bradyrhizobium japonicum*. *Mol Microbiol* (2009), 73(2):291-  
722 305. doi: 10.1111/j.1365-2958.2009.06769.x.

723 Hengge R (2010), The General Stress Response in Gram-Negative Bacteria, p. 251-  
724 289. In Hengge R & Storz G (eds), *Bacterial Stress Responses*, 2nd Edition.  
725 doi.org/10.1128/9781555816841.ch15.

726 Herrou J, Foreman R, Fiebig A & Crosson S. A structural model of anti-anti- $\sigma$   
727 inhibition by a two-component receiver domain: the PhyR stress response regulator. *Mol*  
728 *Microbiol* (2010), 78(2):290-304. doi: 10.1111/j.1365-2958.2010.07323.x.

729 Herrou J, Rotskoff G, Luo Y, Roux B & Crosson S. Structural basis of a protein partner  
730 switch that regulates the general stress response of  $\alpha$ -proteobacteria. *Proc Natl Acad Sci*  
731 *U S A* (2012), 22;109(21):E1415-23. doi: 10.1073/pnas.1116887109.

732 Herrou J, Willett JW & Crosson S. Structured and Dynamic Disordered Domains  
733 Regulate the Activity of a Multifunctional Anti- $\sigma$  Factor. *mBio* (2015), 28;6(4):e00910.  
734 doi: 10.1128/mBio.00910-15.

735 Jans A, Vercruyse M, Gao S, Engelen K, Lambrichts I, Fauvart M & Michiels J.  
736 Canonical and non-canonical EcfG sigma factors control the general stress response in  
737 *Rhizobium etli*. *Microbiologyopen* (2013), 2(6):976-87. doi: 10.1002/mbo3.137.

- 738 Kaczmarczyk A, Campagne S, Danza F, Metzger LC, Vorholt JA & Francez-Charlot  
739 A. Role of *Sphingomonas sp.* strain Fr1 PhyR-NepR- $\sigma$ EcfG cascade in general stress  
740 response and identification of a negative regulator of PhyR. *J Bacteriol* (2011),  
741 193(23):6629-38. doi: 10.1128/JB.06006-11.
- 742 Kaczmarczyk A, Hochstrasser R, Vorholt JA & Francez-Charlot A. Complex two-  
743 component signaling regulates the general stress response in Alphaproteobacteria. *Proc*  
744 *Natl Acad Sci U S A* (2014), 111(48):E5196-204. doi: 10.1073/pnas.1410095111.
- 745 Kim HS, Caswell CC, Foreman R, Roop RM 2nd & Crosson S. The *Brucella abortus*  
746 general stress response system regulates chronic mammalian infection and is controlled  
747 by phosphorylation and proteolysis. *J Biol Chem* (2013), 288(19):13906-16. doi:  
748 10.1074/jbc.M113.459305.
- 749 Ledermann R, Bartsch I, Müller B, Wülser J, Fischer HM. A Functional General Stress  
750 Response of *Bradyrhizobium diazoefficiens* Is Required for Early Stages of Host Plant  
751 Infection. *Mol Plant Microbe Interact*, (2018), 31(5):537-547. doi: 10.1094/MPMI-11-  
752 17-0284-R.
- 753 Lori C, Kaczmarczyk A, de Jong I & Jenal U. A Single-Domain Response Regulator  
754 Functions as an Integrating Hub To Coordinate General Stress Response and  
755 Development in Alphaproteobacteria. *mBio* (2018), 9(3):e00809-18. doi:  
756 10.1128/mBio.00809-18.
- 757 Lourenço RF, Kohler C & Gomes SL. A two-component system, an anti-sigma factor  
758 and two paralogous ECF sigma factors are involved in the control of general stress  
759 response in *Caulobacter crescentus*. *Mol Microbiol* (2011), 80(6):1598-612. doi:  
760 10.1111/j.1365-2958.2011.07668.x.



761 Luebke JL, Eaton DS, Sachleben JR & Crosson S. Allosteric control of a bacterial  
762 stress response system by an anti- $\sigma$  factor. *Mol Microbiol* (2018), 107(2):164-179. doi:  
763 10.1111/mmi.13868.

764 Martínez-García E & de Lorenzo V. Engineering multiple genomic deletions in Gram-  
765 negative bacteria: analysis of the multi-resistant antibiotic profile of *Pseudomonas putida*  
766 KT2440. *Environ Microbiol* (2011), 13(10):2702-16. doi: 10.1111/j.1462-  
767 2920.2011.02538.x.

768 Miller JH. *Experiments in Molecular Genetics*, Cold Spring Harbor: Cold Spring  
769 Harbor Laboratory Press (1972).

770 Pané-Farré J, Quin MB, Lewis RJ & Marles-Wright J. Structure and Function of the  
771 Stressosome Signalling Hub. *Subcell Biochem* (2017), 83:1-41. doi: 10.1007/978-3-319-  
772 46503-6\_1.

773 Porrúa O, García-González V, Santero E, Shingler V & Govantes F. Activation and  
774 repression of a sigmaN-dependent promoter naturally lacking upstream activation  
775 sequences. *Mol Microbiol* (2009), 73(3):419-33. doi: 10.1111/j.1365-  
776 2958.2009.06779.x.

777 Sambrook J, Fritsch EF & Maniatis T. *Molecular Cloning: a Laboratory Manual*. Cold  
778 Spring Harbor, New York: Cold Spring Harbor Laboratory (1989).

779 Staroń A & Mascher T. General stress response in  $\alpha$ -proteobacteria: PhyR and beyond.  
780 *Mol Microbiol* (2010), 78(2):271-7. doi: 10.1111/j.1365-2958.2010.07336.x.

781 Staroń A, Sofia HJ, Dietrich S, Ulrich LE, Liesegang H, Mascher T. The third pillar  
782 of bacterial signal transduction: classification of the extracytoplasmic function (ECF)  
783 sigma factor protein family. *Mol Microbiol*. 2009 Nov;74(3):557-81. doi:  
784 10.1111/j.1365-2958.2009.06870.x.

785

786

## 787 **FIGURE LEGENDS**

788 **Figure 1.**  $\beta$ -galactosidase activity from the *nepR2::lacZ* translational fusion in different  
789  $\Delta nepR$  mutant backgrounds compared to the wild type and the  $\Delta ecfG1$  single mutant. The  
790 activity was measured in exponential (whole bars) and stationary phase (striped bars).

791

792 **Figure 2.** *In vitro* transcription levels defined by the interaction between the different  
793 EcfG-NepR pairs encoded in TFA and protein quantification of the different regulators.

794 A) IVT results using either EcfG1 or EcfG2 as  $\sigma$  factor and increasing concentrations of  
795 either NepR1 or NepR2. Transcription quantifications are referred to those obtained in  
796 the absence of anti- $\sigma$  factor. The dissociation constant ( $K_D$ ) measured for each EcfG-  
797 NepR pair using surface plasmon resonance is indicated underneath each combination.  
798 B) Immunodetection of EcfG1, EcfG2 NepR1 and NepR2 tagged in their C-terminal end  
799 with a 3xFLAG epitope. Samples were collected in exponential (E) and stationary phase  
800 (S). Protein accumulation fold-change (Fc) is indicated underneath.

801

802 **Figure 3.** Stress resistance phenotypes of the  $\Delta phyR1$  and  $\Delta phyR2$  single mutants and the  
803  $\Delta phyR1\Delta phyR2$  double mutant compared to the wild type TFA and the  $\Delta ecfG1\Delta ecfG2$   
804 double mutant (stress-sensitive control). The phenotypes tested were A) resistance to  
805  $CuSO_4$  3.5 mM and NaCl 600 mM, B) exposure to desiccation during 5 h and C) recovery  
806 of the growth after the addition of  $H_2O_2$  10 mM.

807

808 **Figure 4.**  $\beta$ -galactosidase activity from the *nepR2::lacZ* translational fusion in different  
809  $\Delta phyR$  mutant backgrounds compared to the wild type and the  $\Delta ecfG1\Delta ecfG2$  double

810 mutant (negative control). The activity was measured in exponential (whole bars) and  
811 stationary phase (striped bars).

812

813 **Figure 5.** *In vitro* reconstruction of the GSR using 0.2  $\mu$ M of either EcfG1 or EcfG2 as  
814  $\sigma$  factor in an *in vitro* transcription system. The molecular proportions among all proteins  
815 added to each reaction (EcfG:NepR:PhyR) were 1:1.5:3 when using NepR1 as anti- $\sigma$   
816 factor and 1:10:10 when using NepR2. When required, 15 mM acetyl phosphate (AcP)  
817 was added to obtain phosphorylated versions of the PhyR proteins. Transcription  
818 quantifications are referred to those obtained in the absence of NepR and PhyR proteins.

819

820 **Figure 6.** Step-wise representation of the regulatory model for the GSR signalling  
821 pathway in *S. granuli* TFA, indicating the interplay among the regulators and/or their state  
822 in the absence of stress (A), at the onset of the stress signalling (B) and once the GSR is  
823 fully active (C). Green squares represent the four histidine kinases annotated in the TFA  
824 genome, PhyR regulators are represented in dark (PhyR1) and light blue (PhyR2, NepR  
825 anti- $\sigma$  factors are represented in dark (NepR1) and light yellow (NepR2), EcfG  $\sigma$  factors  
826 are represented in light (EcfG1) and dark orange (EcfG2), genes are represented in grey.  
827 Wavy arrows indicate stress sensing (black lines indicate signalling through PhyR1 and  
828 PhyR2, blue lines indicate signalling through PhyR1, red lines indicate signalling through  
829 PhyR2); dashed arrows indicate phosphosrylation of the PhyR regulators (either direct or  
830 through intermediate elements); a green circle represents the phosphorylation of PhyR1  
831 and PhyR2; black arrows indicate a regulatory relationship by direct interaction  
832 (triangular arrowheads indicate a positive effect, flat arrowheads indicate a negative  
833 effect); grey arrows represent transcription and translation.

834

835 **FIGURES**

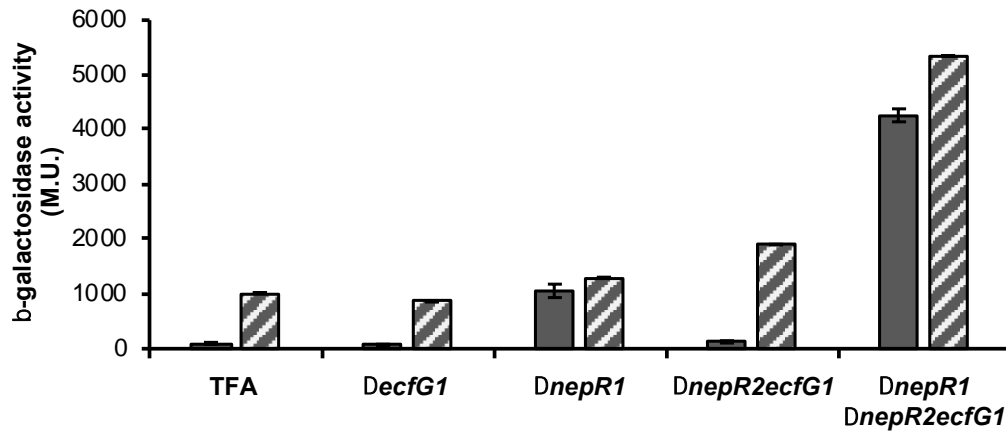

836 **Figure 1.**  $\beta$ -galactosidase activity from the *nepR2::lacZ* translational fusion in different  
837  $\Delta nepR$  mutant backgrounds compared to the wild type and the  $\Delta ecfG1$  single mutant. The  
838 activity was measured in exponential (whole bars) and stationary phase (striped bars).

839

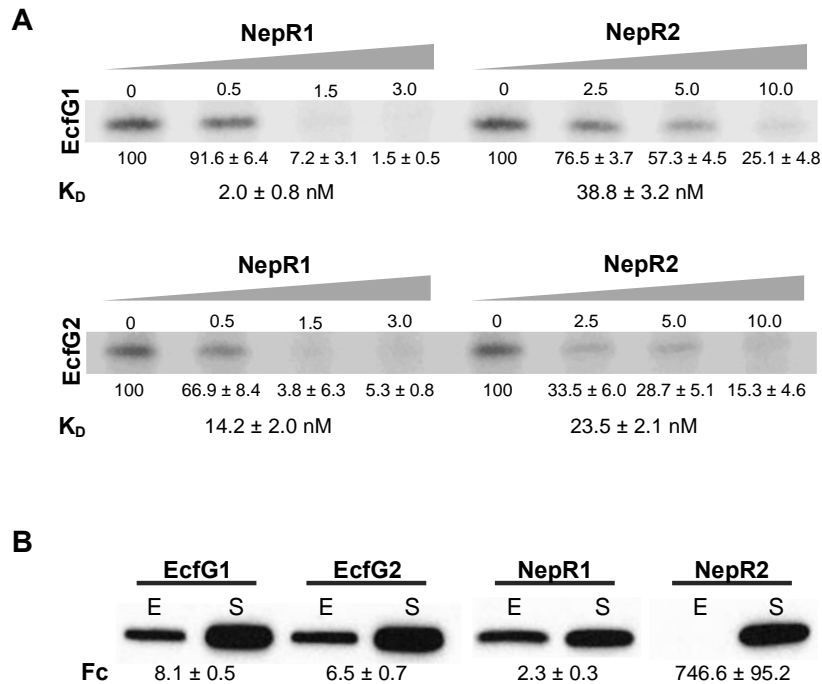

840 **Figure 2.** *In vitro* transcription levels defined by the interaction between the different  
 841 EcfG-NepR pairs encoded in TFA and protein quantification of the different regulators.  
 842 A) IVT results using either EcfG1 or EcfG2 as  $\sigma$  factor and increasing concentrations of  
 843 either NepR1 or NepR2. Transcription quantifications are referred to those obtained in  
 844 the absence of anti- $\sigma$  factor. The dissociation constant ( $K_D$ ) measured for each EcfG-  
 845 NepR pair using surface plasmon resonance is indicated underneath each combination.  
 846 B) Immunodetection of EcfG1, EcfG2 NepR1 and NepR2 tagged in their C-terminal end  
 847 with a 3xFLAG epitope. Samples were collected in exponential (E) and stationary phase  
 848 (S). Protein accumulation fold-change (Fc) is indicated underneath.  
 849

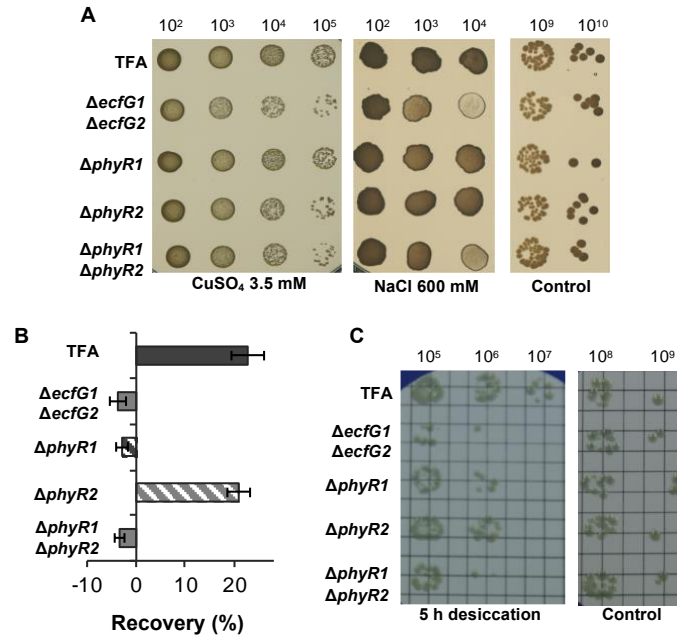

850 **Figure 3.** Stress resistance phenotypes of the  $\Delta phyR1$  and  $\Delta phyR2$  single mutants and the  
 851  $\Delta phyR1\Delta phyR2$  double mutant compared to the wild type TFA and the  $\Delta ecfG1\Delta ecfG2$   
 852 double mutant (stress-sensitive control). The phenotypes tested were A) resistance to  
 853 CuSO<sub>4</sub> 3.5 mM and NaCl 600 mM, B) exposure to desiccation during 5 h and C) recovery  
 854 of the growth after the addition of H<sub>2</sub>O<sub>2</sub> 10 mM.

855

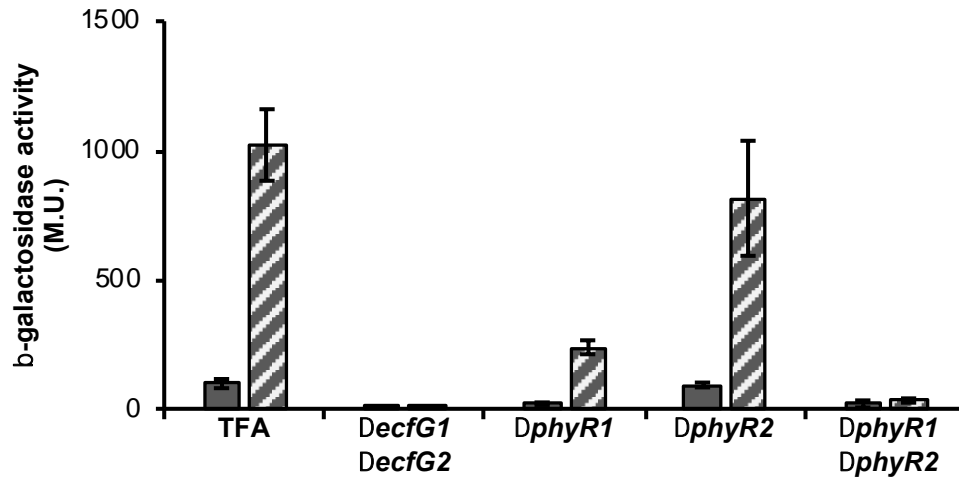

856 **Figure 4.**  $\beta$ -galactosidase activity from the *nepR2::lacZ* translational fusion in different  
857  $\Delta$ *phyR* mutant backgrounds compared to the wild type and the  $\Delta$ *ecfG1* $\Delta$ *ecfG2* double  
858 mutant (negative control). The activity was measured in exponential (whole bars) and  
859 stationary phase (striped bars).

860

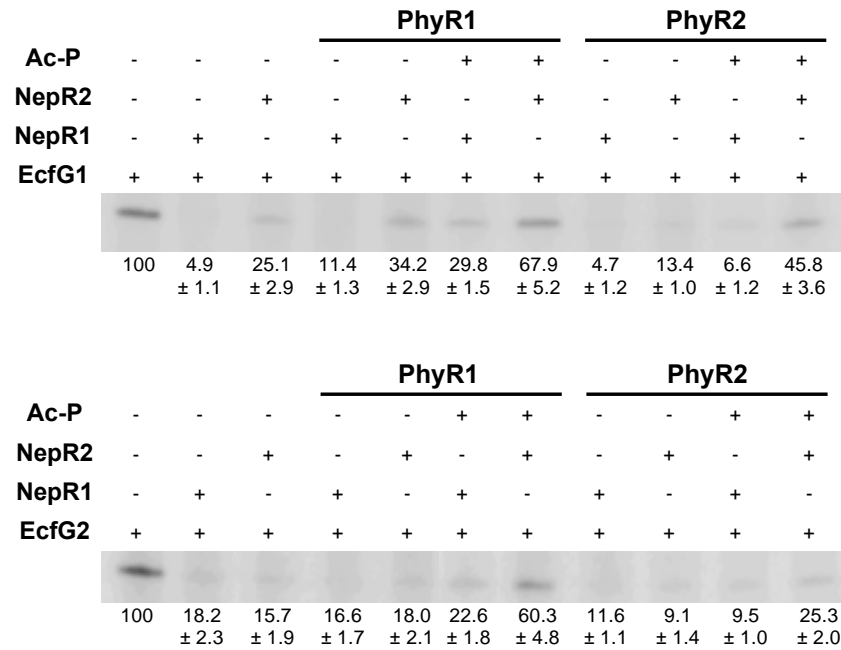

861 **Figure 5.** *In vitro* reconstruction of the GSR using 0.2  $\mu$ M of either EcfG1 or EcfG2 as  
 862  $\sigma$  factor in an *in vitro* transcription system. The molecular proportions among all proteins  
 863 added to each reaction (EcfG:NepR:PhyR) were 1:1.5:3 when using NepR1 as anti- $\sigma$   
 864 factor and 1:10:10 when using NepR2. When required, 15 mM acetyl phosphate (AcP)  
 865 was added to obtain phosphorylated versions of the PhyR proteins. Transcription  
 866 quantifications are referred to those obtained in the absence of NepR and PhyR proteins.  
 867



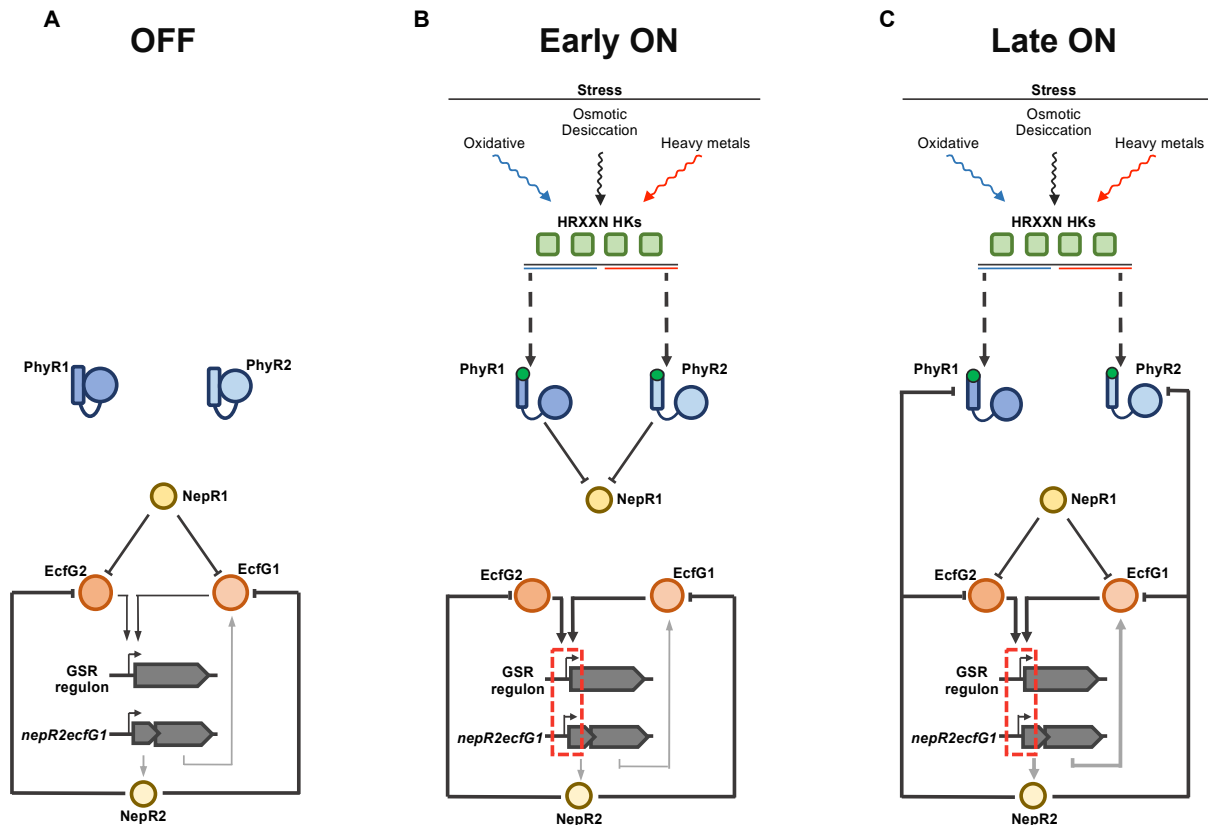

868 **Figure 6.** Step-wise representation of the regulatory model for the GSR signalling  
 869 pathway in *S. granuli* TFA, indicating the interplay among the regulators and/or their state  
 870 in the absence of stress (A), at the onset of the stress signalling (B) and once the GSR is  
 871 fully active (C). Green squares represent the four histidine kinases annotated in the TFA  
 872 genome, PhyR regulators are represented in dark (PhyR1) and light blue (PhyR2, NepR  
 873 anti- $\sigma$  factors are represented in dark (NepR1) and light yellow (NepR2), EcfG  $\sigma$  factors  
 874 are represented in light (EcfG1) and dark orange (EcfG2), genes are represented in grey.  
 875 Wavy arrows indicate stress sensing (black lines indicate signalling through PhyR1 and  
 876 PhyR2, blue lines indicate signalling through PhyR1, red lines indicate signalling through  
 877 PhyR2); dashed arrows indicate phosphosrylation of the PhyR regulators (either direct or  
 878 through intermediate elements); a green circle represents the phosphorylation of PhyR1  
 879 and PhyR2; black arrows indicate a regulatory relationship by direct interaction  
 880 (triangular arrowheads indicate a positive effect, flat arrowheads indicate a negative  
 881 effect); grey arrows represent transcription and translation.
